# Supplementary material for: Synthesis and hydrolysis studies of a peptide containing the reactive triad of serine proteases with an associated linker to a dye on a solid phase supportElectronic supplementary information (ESI) available: Description of preliminary qualitative hydrolysis studies using the materials prepared and described in the main paper. See http://www.rsc.org/suppdata/ob/b3/b302239k/
Source: Royal Society of Chemistry journal article supplement (doi:10.1039/b302239k), 2003-04-01
Supplement: b302239k.doc [file b302239k.doc]

Supplementary Material for Organic & Biomolecular Chemistry

This journal is © The Royal Society of Chemistry 2003

# **Supplementary data**

**SUPPORTING DATA;**

**Synthesis and hydrolysis studies of a peptide containing the reactive triad of serine proteases with an associated linker to a dye on a solid phase support.**

John M. Clough,a Ray V. H Jones,b Hannah McCann,b David J. Morris*c* and Martin Wills**c*

a Syngenta, Jealott's Hill Research Centre, Bracknell, Berkshire, RG42 6EY, UK.

b Syngenta, Earls Road, Grangemouth, Stirlingshire, Stirling, FK3 8XG, Scotland.

c Department of Chemistry, University of Warwick, Coventry, CV4 7AL, UK. Fax: 024 7652 4112; Tel: 024 7652 3260; E-mail: m.wills @csv.warwick.ac.uk.

*Supporting data:* Description of preliminary qualititative hydrolysis studies using the materials prepared and described in the main paper.

*Foreword*. Although the following results indicate that our peptide model may possess the ability to promote intramolecular cleavage of an ester, the results should be regarded as only qualitative at this stage. No quantitative comparison of the hydrolysis has yet been completed and the mechanism of hydrolysis is not known. The level of helicity of the peptide has not been assessed and would be anticipated to change slightly in each solvent system.

With a small library of peptide-tethered dye-labeled esters in hand, preliminary tests on the ester-hydrolysis properties of the beads were carried out in order to gain some information on the optimum poly(ethylene) glycol chain length for the intramolecular hydrolysis. A qualitative study was undertaken to investigate the degree of hydrolysis of these systems, in different solvents and pH values. The analysis required the swelling of small resin samples (0.5 mg) in small vials, in buffer solutions of pH 6, 7 and 8 (0.5 mL) at room temperature overnight. Within each batch of 30 resin samples, the 10 individual glycol dye-linker peptidic systems were represented 3 times. After being allowed to swell overnight, the resin samples were then diluted with an *equal volume* of one of six organic co-solvents (1 mL); acetonitrile, tetrahydrofuran, dioxane, ethyl acetate and DMF. Some of these solvents are fully miscible with water and a single phase is formed. In cases where two phases were formed the samples were not stirred. All reactions were carried out at room temperature and no significant rise in temperature was observed in any of the samples. It was found that no hydrolysis was observed during the overnight swelling and, in a separate analysis, it was found that very little hydrolysis was observed when the supported systems were subjected to just the five organic solvents above. However, upon the addition of the organic co-solvents to the swollen resin samples, it was found that under certain conditions there was significant hydrolysis. The results are summarised in Table 1.

It was found that the peptidyl glycol dye-linker systems DL42 and DL52 gave the most hydrolysis whereas the systems DL21 to DL61 gave no or very slight hydrolysis. The system DL42 when subjected to the organic co-solvent dioxane at pH 7, was found to give the most hydrolysis. The second and third most active systems were DL52 in tetrahydrofuran at pH 8 and acetonitrile at pH 6 respectively although the difference between the three was very slight. The analysis of hydrolysis was undertaken by visually comparing the intensity of the red solution colour; an accurate qualitative analysis was not conducted. The solution of the systems which had yielded the most colour loss were examined by TLC (ethyl acetate:hexane, 4:1) and the only compounds present were the corresponding hydrolysis products, i.e. the acids derived from **4a** and **4b**. It was noticed that most of the hydrolysis occurred within the first two hours and only very slight increases were observed over a further 3 days. In some cases hydrolysis was noted at pH6 and 8 but not 7 (e.g. acetonitrile, DL52) which may indicate a different mechanism in each case. This may also be the reason for the superiority of acetonitrile over dioxane as a solvent at pH 8 but the reverse in the cases of reactions at lower pH.

Intramolecular hydrolysis of the peptidyl glycol dye-linker system DL52 **1** (n=2, m=4) occurred with relatively high levels at pH 6 when acetonitrile was used as a co-solvent. These conditions were again used for the following qualitative analysis. Small resin samples (0.5 mg) of the supported peptidyl glycol dye-linker DL52 **1** (n=2, m=4), peptidyl glycol racemic dye-linker **8** and the non-peptidyl glycol dye-linker **13** (see below for the synthesis of this compound) were individually swollen in a buffer solution (0.5 mL) at pH 6 overnight. Various additives were then introduced (~ 2 mol) followed by acetonitrile (0.5 mL). The quantity of additives was in all cases below the level at which the pH would have been altered, and the pH was checked at regular intervals. All reactions were carried out at room temperature. The results of the subsequent hydrolysis are summarised in Table 2.

Several observations were made:

- No hydrolysis occurred in any of the conditions for the supported glycol dye-linker system **13**. This was encouraging because it confirmed the presence of the peptide was important.
- For the majority of the conditions applied, the same level of hydrolysis that had been experienced in the previous intramolecular studies, was also observed. However, for one example (additive lithium iodide) the highest level of hydrolysis given by any system, was observed. Several additives prevented any hydrolysis from occurring.
- Unfortunately hydrolysis of the peptidyl glycol racemic dye-linker **8** was only observed for one particular condition (additive cesium carbonate) and the level of hydrolysis was not very high. The extra methyl group may increase the level of steric hindrance of approach of a nucleophile to the ester.

Thus the two additives that had shown significant positive effects towards the hydrolysis of the peptidic systems were lithium iodide and cesium carbonate. Therefore in an attempt to quantify the relative level of hydrolysis, the peptidic glycol chiral dye-linker system **8** was then subjected to these two additives at different pH levels and also in dioxane as co-solvent. The additives were largely chosen at random to provide maximum diversity to the study. The results are summarised in Table 3. It was found that when no additive or the additive lithium iodide which had caused the most hydrolysis to occur for the peptidyl glycol dye-linker system **DL**52, were applied to the chiral system **8** under the various new conditions, no hydrolysis was observed. However, when the additive cesium carbonate was employed, hydrolysis was observed to occur for all cases. The conditions which gave the most hydrolysis at pH 8 required acetonitrile as a co-solvent.

Regrettably there was not enough of the peptidyl glycol chiral dye-linker system **8** available to acquire enough of the hydrolysis product to allow analysis *via* chiral HPLC. However it was possible to confirm by TLC (ethyl acetate:hexane) that the hydrolysis product was indeed the expected acid, i.e. 2-methyl-3-(4-hydroxy)phenylpropionic acid bearing the red dye at the phenolic position.

In a limited, qualitative, study of the effect of supported peptide DL52 on the hydrolysis rate of the 4-nitrophenylester of phenylacetic acid, there was reproducible evidence of increased hydrolysis in the presence of peptide in acetonitrile at pH 6. However there was no apparent difference between hydrolysis rates of the same ester in assays containing and lacking the supported peptide under other conditions of solvent and pH. Using a 20-fold excess of ester to catalyst, the hydrolysis appeared to require a brief activation period before the hydrolysis reaction was observed to proceed to any appreciable extent. It is therefore possible that the peptide may be able to act as a true intermolecular catalyst, however further studies are required before any firm conclusion can be reached.

**Synthesis of non-peptide containing ‘blank’ 13.**

We were concerned during the proposed hydrolysis studies that false positive results might be observed if the esters in the peptidyl dye-linker systems were being cleaved when the peptide was being subjected to TFA and the hydrolysis products were subsequently physically binding to the peptide. It had been shown this was unlikely because the supported peptide had been shown to bind the acid from **4a** poorly in acidified organic solvent. Therefore, a ‘blank’ system, **13**, was synthesised where the glycol dye-linker **5b** (n=2, m=4) was coupled directly to a sample of 2-(4-hydroxyphenyl)acetamide-functionalised tentagel **14** (i.e. lacking the intermediate peptide) (Scheme 1). The blank Tentagel dye-linker DL52, system was synthesised by standard Mitsunobu alkylation conditions. After 2 h a jet black resin was acquired which retained its loading upon several washes with various organic solvents and the solvent system TFA:methanol:dichloromethane, 1:10:39. This was then subjected to the TIS:TFA solution used to deprotect the peptidyl systems and it was found that no colour loss was observed over a period of 4 h which was four times longer than the peptidyl deprotection stage. A very slight light pink solution was acquired after 24 h in solution.

In view of this observation and with the knowledge that the hydrolysis product (the acid from **4a**) did not bind the peptidyl system in acidified organic solvent, it was concluded that contamination by the hydrolysis product was unlikely.
